# Supplementary material
Source: Springer Nature journal article supplement (https://www.springermedizin.de/resource/supplementary/12885_2012_3377_MOESM2_ESM.pdf/9463354)
Supplement: MOESM2 [file 9463354]

### Additional file 2 – Supplementary table 2.

Coefficients, standard errors, odds ratios and confidence intervals of miR-99a/miR-199b miRNA signature (backward regression model).

|       |          | Coefficient | SE    | p     | OR    | 95% CI       |
|-------|----------|-------------|-------|-------|-------|--------------|
| $b_1$ | miR-99a  | 2.081       | 0.874 | 0.017 | 8.013 | 1.444–44.475 |
| $b_2$ | miR-199b | 0.865       | 0.335 | 0.01  | 2.376 | 1.231–4.586  |
| $b_0$ | constant | -4.543      |       |       |       |              |
